# Supplementary material for: Clinically Relevant Escherichia coli Isolates from Process Waters and Wastewater of Poultry and Pig Slaughterhouses in Germany
Source: MDPI journal article supplement (doi:10.3390/microorganisms9040698), 2021-03-28
Supplement: s1 [file s1]

## ***Supplementary Material***

### **Clinically relevant *Escherichia coli* isolates from process waters and wastewater of poultry and pig slaughterhouses in Germany**

Mykhailo Savin, Gabriele Bierbaum, Judith Kreyenschmidt, Ricarda Maria Schmithausen, Esther Sib, Silvia Schmoger, Annemarie Käsbohrer and Jens Andre Hammerl

Corresponding authors:

Dr. Mykhailo Savin, Institute for Hygiene and Public Health, Medical Faculty,

University of Bonn, Campus Venusberg 63, 53127 Bonn, Germany

E-mail: [m.savin@uni-bonn.de](mailto:m.savin@uni-bonn.de)

Dr. Jens Andre Hammerl, Unit Epidemiology, Zoonoses and Antimicrobial

Resistances, Department of Biological Safety, German Federal Institute for Risk

Assessment, Max-Dohrn Str. 8-10, D-10589 Berlin, Germany

E-mail: [jens-andre.hammerl@bfr.bund.de](mailto:jens-andre.hammerl@bfr.bund.de)

**Table S1: Selected characteristics of the investigated slaughterhouses.**

|                                                     | Poultry<br>Slaughterhouse<br>S1                                                  | Poultry<br>Slaughterhouse<br>S2    | Pig<br>Slaughterhouse<br>S1                                      | Pig<br>Slaughterhouse<br>S2        |
|-----------------------------------------------------|----------------------------------------------------------------------------------|------------------------------------|------------------------------------------------------------------|------------------------------------|
| Daily<br>slaughtering<br>capacity                   | >100,000                                                                         | >100,000                           | >3,000                                                           | >3,000                             |
| Daily<br>amount of<br>wastewater,<br>m <sup>3</sup> | 600                                                                              | 3,600                              | 2,100                                                            | 550                                |
| Type of<br>WWTP                                     | Membrane<br>bioreactor<br>(MBR) with<br>immersed<br>ultrafiltration<br>membranes | Conventional<br>biological<br>WWTP | Conventional<br>biological and<br>physical-<br>chemical<br>WWTPs | Conventional<br>biological<br>WWTP |
| Direct<br>discharger                                | Yes                                                                              | Yes                                | No                                                               | No                                 |

**Table S2: Number of samples taken at each sampling point in poultry slaughterhouses.**

|                                        | <b>Poultry slaughterhouses<br/>S1/S2<sup>a, b</sup></b> |
|----------------------------------------|---------------------------------------------------------|
| Poultry Transport Trucks               | 5                                                       |
| Poultry Transport Crates               | 10                                                      |
| Stunning Facilities                    | 10                                                      |
| Scalding water                         | 10                                                      |
| Eviscerators                           | 10                                                      |
| Production Facilities                  | 5                                                       |
| Influent in-house WWTP <sup>c, d</sup> | 16                                                      |
| Effluent in-house WWTP <sup>c, d</sup> | 16                                                      |

a – sampling campaigns in December 2016, July 2017, August 2017, December 2017, February 2018

b – sampling campaigns in October 2017, November 2017, March 2018, April 2018, Mai 2018

c – additional sampling campaigns in the S1 in-house WWTP in September 2017, November 2017, March 2018

d – additional sampling campaigns in the S2 in-house WWTP in July 2018, September 2018, October 2018

**Table S3: Number of samples taken at each sampling point in pig slaughterhouses.**

|                                                | <b>Pig slaughterhouses<br/>S1<sup>a</sup>/S2<sup>b</sup></b> |      |
|------------------------------------------------|--------------------------------------------------------------|------|
| Wastewater from animal transporters            | 2/10                                                         | 1/10 |
| Wastewater from holding pens                   | 2/7                                                          | 0/7  |
| Scalding and dehairing water                   | 2/10                                                         | 0/10 |
| Aggregate wastewater from producing facilities | 5/10                                                         | 0/10 |
| Influent biological WWTPs                      | 7/10                                                         | 0/10 |
| Influent chemical-physical WWTP                | 4/5                                                          | 0/5  |
| Effluent biological WWTPs                      | 4/10                                                         | 0/10 |
| Effluent chemical-physical WWTP                | 0/5                                                          | 0/5  |

a – sampling campaigns in S1: March 2017, September 2017, October 2017, January 2018, February 2018

b – sampling campaigns in S2: March 2018, April 2018, May 2018, June 2018, July 2018.
